# Supplementary material for: Outcomes of patients with ST-segment myocardial infarction admitted during the COVID-19 pandemic
Source: Springer Nature journal article supplement (doi:10.1007/s00059-021-05058-7), 2021-08-17
Supplement: MOESM1 [file 19576524]

1. I thought my complaints could be related to a pulmonary disorder.
2. I thought my complaints could be related to a musculoskeletal disorder.
3. I feared getting infected in-hospital.
4. I thought my admission could overburden the medical personal or health system.
5. Information by the media made me reconsider my admission.

Every question could be answered by one of the following choices:

- Yes
- No
- Do not know / Do not want to answer

Supplementary material 1 : 5-item questionnaire on factors possibly delaying immediate admission
